1 **Title:** TRPV1-mediated sonogenetic neuromodulation of motor cortex in freely moving mice

2 **Author names and affiliations:** Kevin Xu<sup>a</sup>, Yaoheng Yang<sup>a</sup>, Zhongtao Hu<sup>a</sup>, Yimei Yue<sup>a</sup>,  
3 Jianmin Cui<sup>a</sup>, Joseph P. Culver<sup>a,b,c</sup>, Michael R. Bruchas<sup>d</sup>, Hong Chen<sup>a,e</sup>\*

4 <sup>a</sup> *Department of Biomedical Engineering, Washington University in St. Louis, Saint Louis,*  
5 *Missouri, 63130, USA.*

6 <sup>b</sup> *Mallinckrodt Institute of Radiology, Washington University School of Medicine, Saint Louis,*  
7 *Missouri, 63110, USA*

8 <sup>c</sup> *Department of Physics, Washington University in St. Louis, Saint Louis, Missouri, 63110,*  
9 *USA*

10 <sup>d</sup> *Department of Anesthesiology and Pain Medicine, Center of Neurobiology of Addiction,*  
11 *Pain, and Emotion, University of Washington, Seattle, Washington, 98195, USA*

12 <sup>e</sup> *Department of Radiation Oncology, Washington University School of Medicine, Saint Louis,*  
13 *Missouri, 63108, USA*

14 **Author contributions:** HC and KX designed research; KX, YHY, ZH, and YMY performed  
15 research; KX, YHY, and HC analyzed data; JC, JPC, and MRB contributed to discussion  
16 and interpretation of the results. HC and KX wrote the manuscript, and all authors revised  
17 and modified the manuscript.

18 **Corresponding author:** Hong Chen, Ph.D. Department of Biomedical Engineering and  
19 Department of Radiation Oncology, Washington University in St. Louis. 4511 Forest Park  
20 Ave. Saint Louis, MO, 63108, USA. Email: hongchen@wustl.edu

21

22 **Abstract**

23 **Background:** Noninvasive and cell-type-specific neuromodulation tools are critically needed  
24 for probing intact brain function. Sonogenetics for noninvasive activation of neurons  
25 engineered to express thermosensitive transient receptor potential vanilloid 1 (TRPV1) by  
26 transcranial focused ultrasound (FUS) was recently developed to address this need.  
27 However, using TRPV1-mediated sonogenetics to evoke behavior by targeting the cortex is  
28 challenged by its proximity to the skull due to high skull absorption of ultrasound and  
29 increased risks of thermal-induced tissue damage.

30 **Objective:** This study evaluated the feasibility and safety of TRPV1-mediated sonogenetics  
31 in targeting the motor cortex to modulate the locomotor behavior of freely moving mice.

32 **Methods:** Adeno-associated virus was delivered to the mouse motor cortex via intracranial  
33 injection to express TRPV1 in excitatory neurons. A wearable FUS device was installed on  
34 the mouse head after a month to control neuronal activity by activating virally expressed  
35 TRPV1 through FUS sonication at different acoustic pressures. Immunohistochemistry  
36 staining of *ex vivo* brain slices was performed to verify neuron activation and evaluate  
37 safety.

38 **Results:** TRPV1-mediated sonogenetic stimulation at 0.7 MPa successfully evoked  
39 rotational behavior in the direction contralateral to the stimulation site, activated cortical  
40 neurons as indicated by the upregulation of c-Fos, and did not induce significant changes in  
41 inflammatory or apoptotic markers (GFAP, Iba1, and Caspase-3). Sonogenetic stimulation of  
42 TRPV1 mice at a higher acoustic pressure, 1.1 MPa, induced significant changes in motor  
43 behavior and upregulation of c-Fos compared with FUS sonication of naïve mice at 1.1 MPa.  
44 However, signs of damage at the meninges were observed at 1.1 MPa.

45 **Conclusions:** TRPV1-mediated sonogenetics can achieve effective and safe  
46 neuromodulation at the cortex with carefully selected FUS parameters. These findings  
47 expand the application of this technique to include superficial brain targets.

48

49 **Keywords:** TRPV1, sonogenetics, motor cortex, ultrasound, behavior, neuromodulation

## 50 **Introduction**

51 The evolution of brain neuromodulation tools has provided unprecedented opportunities to  
52 probe neural circuits, understand brain function, and develop new treatment strategies for  
53 brain diseases. Transcranial neuromodulation tools, such as direct current, magnetic  
54 stimulation, and ultrasound stimulation, offer noninvasive ways to stimulate the brain and  
55 have contributed to the understanding of brain function [1,2]. The lack of cell-type specificity  
56 in these tools, however, limits their utility in understanding the brain at cellular resolution.  
57 Genetic-based neuromodulation tools, such as optogenetics and chemogenetics, encode  
58 stimulus-sensitive probes into a defined neuron population and have transformed  
59 fundamental neuroscience research [3,4]. Each method, however, suffers from its own  
60 limitations. Most commonly, optogenetics requires the invasive implantation of optical probes  
61 to deliver light to opsin-encoding neurons, limiting the ability to study the brain without the  
62 risk of ischemia and inflammation. Noninvasive optogenetics modulates the activity of opsin-  
63 encoding neurons via transcranial illumination, but light scattering in brain tissue limits its  
64 depth penetration in large animal models [5]. On the other hand, chemogenetics  
65 noninvasively activates neurons encoding designer receptors exclusively activated by  
66 designer drugs (DREADDs) via minimally-invasive systemic delivery of designer drugs, but  
67 the long residence time of circulating drugs sacrifices the temporal resolution of this  
68 technique. There is a clear need for techniques that can facilitate noninvasive, cell-type  
69 specific neuromodulation with high spatiotemporal resolution and the potential to be scaled  
70 up to large animals and humans.

71

72 Sonogenetics has great potential to fulfill this gap. Analogous to other genetic-based  
73 neuromodulation tools, sonogenetics uses focused ultrasound (FUS) to modulate the activity  
74 of neurons encoding ultrasound-sensitive actuators [6]. Unlike other stimulation modalities  
75 (e.g., light, electricity, and magnetic fields), FUS can achieve noninvasive, spatiotemporally  
76 precise targeting of any brain region in small animals [7], large animals [2], and even

77 humans [8]. Sonogenetics was first demonstrated in 2015 using *C. elegans*, in which  
78 mechanosensitive TRP-4 ion channel expression in neurons in combination with  
79 microbubbles evoked behavioral changes upon ultrasound stimulation [9]. Since the first  
80 demonstration of sonogenetics, many other mechanosensitive ion channels and proteins  
81 have been proposed to sensitize cells to ultrasound stimulation *in vitro*, including TREK1,  
82 TREK2, TRAAK [10], MscL [11], Piezo1 [12], MEC-4 [13], prestin [14], TRPA1 [15], TRPC1,  
83 TRPP2, and TRPM4 [16]. Recently, multiple studies demonstrated the feasibility of  
84 sonogenetics to modulate mouse behavior *in vivo* using ultrasound-sensitive probes such as  
85 prestin [17], MscL G22S [18], and TRPA1 [19].

86

87 Ultrasound propagation in tissue can generate not only mechanical effects but also thermal  
88 effects. The transient receptor potential vanilloid 1 (TRPV1) ion channel is extremely  
89 sensitive to temperature and has a thermal activation threshold of approximately 42°C,  
90 which is only a few degrees above the physiological body temperature of many mammals  
91 [20]. Such an activation temperature allows TRPV1 to be closed at the physiological body  
92 temperature and open upon sufficient heating to ~42°C. Because of these unique features,  
93 TRPV1 has been used to develop genetics-based neuromodulation techniques, such as  
94 magneto-thermogenetics [21,22] and photothermal genetics [23]. TRPV1-mediated  
95 sonogenetics was recently developed to achieve noninvasive, cell-type specific  
96 neuromodulation. Our previous study demonstrated that TRPV1 is an ultrasound-sensitive  
97 actuator, and that TRPV1-mediated sonogenetics can control the motor behavior of freely  
98 moving mice by targeting a deep brain region, the striatum [24]. However, the capability of  
99 TRPV1-mediated sonogenetics in controlling mouse behavior by targeting the superficial  
100 brain area has not been demonstrated. Targeting superficial brain regions is challenging for  
101 TRPV1-mediated sonogenetics because the high absorption of ultrasound in the skull could  
102 increase the risk of overheating the cortex area directly underneath the skull [25,26]. This  
103 could increase the risk of undesirable neuromodulatory effects associated with heating and  
104 potential tissue damage when the temperature is high. Therefore, the objective of the current

105 study was to assess the capability of TRPV1-mediated sonogenetics in evoking mouse  
106 motor behavior by targeting a superficial brain target – the motor cortex.

## 107 **Materials and methods**

### 108 **Stereotaxic injection of virus**

109 All animal procedures were performed under a protocol approved by the Washington  
110 University in St. Louis Institutional Animal Care and Use Committee (IACUC). C57/BL6 mice  
111 (female, 6-8 weeks old) were purchased from Charles River and housed in an animal facility  
112 under a 12 hour light-dark cycle. Adeno-associated viruses (AAV) were introduced to  
113 CaMKII-expressing neurons of the M2 cortex to overexpress TRPV1 ion channel. All  
114 surgeries were conducted under aseptic conditions. Mice were anesthetized with 2%  
115 isoflurane in oxygen at a rate of 1.0 L/min in an anesthetic chamber for induction and 1.5%  
116 isoflurane for maintaining anesthesia. Anesthetized mice were then fixed onto a stereotaxic  
117 frame (Kopf Instruments) using a bite bar and ear bars. Buprenorphine SR (1.0 mg/kg) was  
118 administered subcutaneously for pre-operative and post-operative pain management. The  
119 head was shaved and was rubbed with skin disinfectant (Hibiclens). An incision was made  
120 on the scalp, the skin was retracted, and the periosteum was removed. A small hole was  
121 drilled through the skull (-1.0 mm ML, +2.5 mm AP, -1.0 mm DV), and a micro-injector  
122 (Nanoject II, Drummond Scientific) was inserted into the motor cortex. 1200 nL of TRPV1  
123 virus (1.4e12 vg/mL) was introduced at a rate of 64 nL/min. 1000 nL of control virus (3.2e12  
124 vg/mL) was introduced to approximately match the viral genome copy numbers delivered to  
125 the motor cortex. After injection, the micro-injector was slowly removed, the hole was filled  
126 with bone wax, and the scalp was sutured. Mice were housed for at least 4 weeks to  
127 facilitate sufficient virus expression before further treatments were conducted.

128

### 129 **Wearable FUS device**

130 A wearable FUS device was used to stimulate the motor cortex of freely moving mice, and  
131 the design is described in the first report of TRPV1-mediated sonogenetics [24]. In brief, the  
132 wearable FUS device consisted of two parts: a FUS transducer and a base plate. The FUS  
133 transducer was made of a lead zirconate titanate (PZT) ceramic resonator (DL-43, DeL

134 Piezo Specialties) encapsulated by a 3D-printed housing. The PZT ceramic resonated at a  
135 frequency of 1.5 MHz and had an aperture of 10 mm and a radius of curvature of 10 mm.  
136 The wearable FUS transducer was plugged into the base plate, a 3D printed circular adapter  
137 attached to the mouse skull. When the FUS transducer was plugged into the base plate, the  
138 wearable FUS device was stabilized on the mouse head.

139

140 Each component of the wearable FUS device was specifically designed to target the motor  
141 cortex. The base plate was designed with a hole in its geometric center to facilitate the  
142 alignment of base plate to the medial-lateral and anterior-posterior coordinates of the motor  
143 cortex. The height of the FUS transducer housing was designed to align the FUS focus to  
144 the dorsal-ventral coordinates of the motor cortex. The entire wearable FUS device was  
145 calibrated by a hydrophone (HGL-200, Onda). The full width half-maximum of the FUS focal  
146 region was approximately 0.9 mm and 2.5 mm in the lateral and axial directions, respectively.

147

#### 148 **Attachment of FUS transducer base plate to the mouse skull**

149 Four to five weeks after virus injection, mice were again anesthetized with isoflurane (2% for  
150 induction, 1.5% for maintenance), fixed in a stereotaxic frame, and subcutaneously  
151 administered with Buprenorphine SR (1.0 mg/kg). A piece of the scalp was removed, the  
152 periosteum was removed, and the drilled hole from the intracranial injection of AAV was  
153 identified and accentuated with a marker. The custom designed base plate was 3D-printed  
154 and glued onto the skull using dental adhesives (Metabond) with the center of the base plate  
155 aligned to the pre-drilled hole. The mice were housed for a week to facilitate sufficient  
156 recovery before performing behavior experiments.

157

#### 158 **FUS stimulation with behavior recording**

159 Prior to the behavior test, mice were adapted to the behavior recording environment by  
160 placing the mouse in the behavior testing arena with the power amplifier turned on. During  
161 the behavior recording, mice were lightly anesthetized with isoflurane (1% induction and



162 maintenance). The base plate on the mouse and the wearable ultrasound transducer were  
163 both sufficiently filled with degassed ultrasound gel (Aquasonics). The wearable transducer  
164 was then securely plugged into the base plate of the mouse, and the mouse was then  
165 placed in a circular arena on a heating pad for 30 min to allow the mouse body temperature  
166 to recover from any possible anesthesia effects. The heating pad was then removed, and  
167 the mouse was allowed to habituate for 15 min in the actual behavior test arena.

168

169 During the recording period, focused ultrasound was applied at a frequency of 1.5 MHz, duty  
170 cycle of 40%, PRF of 10 Hz, and 15 s total sonication duration with 185 s inter-stimulation  
171 interval for a total of 5 stimulations. The onset and offset of the ultrasound pulse was  
172 smoothed to avoid possible auditory effects [27]. The acoustic pressures used in the study  
173 were 0, 0.7, and 1.1 MPa to investigate the effect of pressure on locomotor behavior  
174 outcomes. Custom MATLAB software was used to control when ultrasound was applied via  
175 an Arduino Uno. A red LED attached to the Arduino Uno would turn on when ultrasound was  
176 applied to precisely synchronize mouse behavior to each focused ultrasound stimulation. In  
177 each group, mice were given five consecutive focused ultrasound stimulations at one  
178 pressure.

179

### 180 **Behavioral analysis**

181 Mice were recorded using a camera (Logitech C920X, 30 fps) before, during, and after each  
182 focused ultrasound stimulation. During the recording session, each video is simultaneously  
183 processed using Bonsai to quantify the positional coordinates and the angular orientation of  
184 the mice. After conducting recordings, data were processed using a custom MATLAB script  
185 to compute the average angular velocities upon FUS stimulation at different acoustic  
186 pressures.

187

### 188 **Immunohistological analysis**

189 Approximately 90 minutes after the last FUS stimulation, TRPV1- and TRPV1+ mice from  
190 each acoustic pressure stimulation group were sacrificed via transcardial perfusion with 1x  
191 PBS solution for the evaluation of TRPV1 expression, c-Fos expression, and safety of  
192 sonogenetics via inflammatory and apoptotic markers (GFAP, Iba1, and Caspase-3). A  
193 sacrifice time of 90 minutes post stimulation was chosen to visualize the peak expression of  
194 c-Fos [28]. This time was also suitable to visualize any rapid recruitment of inflammatory and  
195 apoptotic markers at the FUS stimulation site [29]. The brains were fixed in 4% w/v  
196 paraformaldehyde in 1x PBS solution overnight and were transferred to 15% and 30% w/v  
197 sucrose in 1x PBS for the following two days, respectively. The brain tissue was embedded  
198 in a cryomold with Optimal Cutting Temperature medium (Scigen) to generate 10  $\mu$ m thick  
199 coronal brain slices affixed on a glass slide.

200

201 For evaluation of TRPV1 and c-Fos expression, slides with brain tissue were stained with  
202 anti-TRPV1 antibody (Novus Biologicals, 1:200), anti-c-Fos antibody (Cell Signaling, 1:1000),  
203 and Nissl stain (Invitrogen, 1:100). TRPV1 and c-Fos were visualized using Alexa Fluor 594  
204 and 488 secondary antibody (Jackson ImmunoResearch, 1:400), respectively. For cellular  
205 safety evaluation, slides with brain tissue were stained with anti-GFAP antibody (Abcam,  
206 1:1000), anti-Iba1 antibody (Wako, 1:1000), or anti-Caspase-3 antibody (Cell Signaling,  
207 1:2500), as well as DAPI mounting medium (Vector). GFAP, Iba1, and Caspase-3 cells were  
208 visualized using Alexa Fluor 488 secondary antibody (Jackson ImmunoResearch, 1:400).  
209 Cell counts were computed in the motor cortex using QuPath (University of Edinburgh). The  
210 viral spread was quantified by drawing a region that encapsulated all the TRPV1+ neurons.  
211 TRPV1+ and c-Fos+ neuron cell densities were calculated by counting the total number of  
212 positively stained Nissl cells over the motor cortex region. GFAP, Iba1, and Caspase-3 cell  
213 counts were calculated by counting the total number of positively-stained DAPI cells over the  
214 motor cortex region.

215

216 **Statistics**

217 Statistical tests were conducted using GraphPad. Data were analyzed using either a two-  
218 tailed t-test or repeated measures ANOVA with either Bonferroni's post-hoc test (to compare  
219 row- and column-wise groups) or Dunnett's post-hoc test (to compare to a control group).  
220 Statistical differences were considered significant whenever  $p < 0.05$ . All graphs presented  
221 results as the mean  $\pm$  standard error of the mean (SEM).

## 222 **Results**

223 We intracranially injected adeno-associated virus (AAV) to the mouse motor cortex (M2) to  
224 express TRPV1 primarily in excitatory neurons under the CaMKII promoter (**Fig. 1a**). These  
225 mice are referred to as TRPV1+ mice. Control mice were injected with TRPV1- virus,  
226 referred to as TRPV1- mice. After sufficient virus expression, a wearable FUS transducer  
227 was attached to the mouse head. Mouse locomotion was assessed before, during, and after  
228 FUS sonication in an open-field behavior test arena. FUS sonication was targeted at the  
229 motor cortex using the same coordinates as the virus injection by mechanically aligning the  
230 FUS device to the craniotomy from the virus injection. FUS was applied with a center  
231 frequency of 1.5 MHz, a pulse repetition frequency (PRF) of 10 Hz, a duty cycle (DC) of 40%,  
232 acoustic pressures of 0.7 and 1.1 MPa, and a burst duration (BD) of 15 s with an inter-  
233 stimulation interval (ISI) of 185 s for a total of five stimulations (**Fig. 1b**). Mice were  
234 sacrificed after the behavior test to evaluate the expression of TRPV1, the activation of  
235 neurons (c-Fos), and safety of sonogenetics.

236

### 237 **Characterization of exogenous TRPV1 expression in the motor cortex**

238 We first describe the virus expression level of TRPV1 in the motor cortex. The brains of  
239 TRPV1+ mice were harvested, sectioned, and co-stained with anti-TRPV1 antibody and  
240 Nissl to evaluate the expression profile of TRPV1 in cortical neurons of the motor cortex. A  
241 representative brain slice of a TRPV1+ mouse illustrated that TRPV1 expression was  
242 primarily confined to the motor cortex (**Fig. 2a**). As expected, the contralateral non-injection  
243 site did not express any TRPV1 in cortical neurons of the motor cortex. The viral spread of  
244 TRPV1 in the cortex was  $1.06 \pm 0.07 \text{ mm}^2$ , and the density of neurons in the motor cortex  
245 that were virally transduced to express TRPV1 was  $66.7 \pm 4.0 \text{ cells/mm}^2$  (**Fig. 2b-c**). The  
246 proportion of neurons in the motor cortex that expressed TRPV1 cells was  $5.16 \pm 0.43\%$   
247 (**Fig. 2d**). Higher magnification of the virus transduction region showed that TRPV1  
248 expression was largely confined to neurons, in which  $83.4 \pm 3.0\%$  of the cells transfected

249 with TRPV1 were neurons (**Fig. 2e**). These data demonstrate the feasibility of exogenous  
250 TRPV1 expression in the motor cortex region and lay the foundation to facilitate TRPV1-  
251 mediated sonogenetic control of motor cortex behaviors.

252

### 253 **TRPV1-mediated sonogenetic neuromodulation within the motor cortex alters** 254 **locomotor behavior**

255 We recorded the locomotor behavior of TRPV1- and TRPV1+ mice with the application of  
256 FUS at the motor cortex to assess the ability of TRPV1-mediated sonogenetics in  
257 modulating locomotor behavior. Representative locomotor behavior of TRPV1- and TRPV1+  
258 mice with and without FUS are shown as position traces (**Fig. 3a; TRPV1-, Movie S1;**  
259 **TRPV1+, Movie S2**). FUS sonication at 0.7 MPa did not evoke considerable motion in  
260 TRPV1- mice compared to that before FUS. In TRPV1+ mice, however, FUS stimulation did  
261 evoke rotational behavior around the behavior testing arena, which was not observed before  
262 FUS. During the FUS sonication periods (shown by the highlighted yellow bars), TRPV1+  
263 mice displayed rotational behavior indicated by changes in angular displacement and  
264 angular velocity (**Fig. 3b, 3c**). In contrast, TRPV1- mice did not demonstrate any rotational  
265 bias upon FUS sonication.

266

267 We then compared the average angular velocities of TRPV1- and TRPV1+ mice with FUS at  
268 acoustic pressures of 0.7 and 1.1 MPa. In the TRPV1+ mice group, FUS stimulation at 0.7  
269 MPa evoked a significant increase in angular velocity ( $0.86 \pm 0.23$  rev/min) compared to the  
270 sham stimulation at 0 MPa ( $-0.22 \pm 0.25$  rev/min), indicating that TRPV1+ mice displayed a  
271 preference to rotate in the direction contralateral to the stimulation site (**Fig. 4; ~4-fold**  
272 **increase,  $p = 0.026$ , two-way repeated measures ANOVA with Bonferroni's post-hoc test**). In  
273 contrast, FUS stimulation at 0.7 MPa did not evoke any significant angular velocity changes  
274 in the TRPV1- mice group relative to the sham stimulation (0.7 MPa:  $-0.20 \pm 0.31$  rev/min; 0  
275 MPa:  $-0.17 \pm 0.21$  rev/min). These findings indicate that TRPV1-mediated sonogenetics at  
276 0.7 MPa can achieve circuit-specific control of locomotor behaviors in the motor cortex.

277 Increasing the acoustic pressure to 1.1 MPa did not evoke significant changes in angular  
278 velocity compared to the sham stimulation at 0 MPa in TRPV1+ mice (1.1 MPa:  $0.36 \pm 0.53$   
279 rev/min). However, sonogenetics stimulation at 1.1 MPa of TRPV1+ mice achieved a  
280 significantly higher angular velocity than that obtained by FUS sonication at 1.1 MPa of  
281 TRPV1- mice ( $p = 0.036$ ). Although not statistically significant, FUS sonication at 1.1 MPa of  
282 TRPV1- mice evoked an increase in the average angular velocity in the ipsilateral direction ( $-$   
283  $0.88 \pm 0.36$  rev/min) compared with those at 0 MPa and 0.7 MPa. These findings suggest  
284 that FUS stimulation at 1.1 MPa alone (without TRPV1) potentially induced neuromodulation  
285 effects and generated a confounding impact on TRPV1-mediated sonogenetics at this high-  
286 pressure level.

287

#### 288 **TRPV1-mediated sonogenetics activates cortical neurons on the cellular level**

289 To provide a secondary readout for successful modulation of the motor cortex using  
290 sonogenetics, we sacrificed the mice 90 minutes after the final stimulation and used  
291 immunohistochemical staining to analyze c-Fos expression levels of TRPV1+ and TRPV1-  
292 mice. Representative fluorescent images of TRPV1- and TRPV1+ brains stimulated at  
293 different acoustic pressures demonstrate that sonication at both 0.7 MPa and 1.1 MPa  
294 elicited greater c-Fos expression levels in the motor cortex of TRPV1+ mice (**Fig. 5a**). Group  
295 analysis found that TRPV1+ mice showed enhancement in the number of c-Fos cells at both  
296 0.7 MPa ( $231.5 \pm 58.3$  cells/mm<sup>2</sup>) and 1.1 MPa ( $332.1 \pm 74.2$  cells/mm<sup>2</sup>) compared to the  
297 unstimulated side ( $89.4 \pm 22.2$  cells/mm<sup>2</sup>), indicating activation of neurons in the motor  
298 cortex (**Fig. 5b**; 0.7 MPa: ~2.6-fold change,  $p = 0.011$ ; 1.1 MPa: ~3.7-fold change,  $p <$   
299  $0.0001$ ; two-way ANOVA with Bonferroni's post-hoc test). On the other hand, FUS  
300 stimulation at 0.7 MPa and 1.1 MPa did not evoke significant enhancements in c-Fos  
301 expression in TRPV1- mice (0 MPa:  $70.1 \pm 19.1$  cells/mm<sup>2</sup>; 0.7 MPa:  $51.8 \pm 21.8$  cells/mm<sup>2</sup>;  
302 1.1 MPa:  $144.5 \pm 50.4$  cells/mm<sup>2</sup>). While there is a slight potential increase in c-Fos  
303 expression in TRPV1- mice from FUS alone at 1.1 MPa compared to the unstimulated  
304 control, this relationship was not statistically significant ( $p = 0.34$ ). These data demonstrate

305 the ability of TRPV1-mediated sonogenetics to activate motor cortex neurons at the cellular  
306 level at both 0.7 MPa and 1.1 MPa.

307

308 **Inflammatory and apoptotic responses in the brain are not engaged by TRPV1-**  
309 **mediated sonogenetics**

310 Gross pathology of the mice skull and brain stimulated at 0.7 MPa showed no signs of  
311 damage (**Fig. 6a**). In contrast, bleeding was consistently observed in the meninges between  
312 the skull and the brain at 1.1 MPa. Furthermore, we used Nissl to stain for signs of neuronal  
313 damage, GFAP and Iba1 to stain for signs of inflammation, and Caspase-3 to stain for signs  
314 of apoptosis (**Fig. 6b**). Using the non-injection and non-stimulated side of both TRPV1+ and  
315 TRPV1- mice as the control, there were no significant differences in any of the protein  
316 marker expression levels in the mouse brain at 0.7 MPa or 1.1 MPa (**Fig. 6c**; one-way  
317 repeated measures ANOVA with Dunnett's post-hoc test). Both gross pathology and  
318 immunohistological analysis of inflammatory and apoptotic markers showed that TRPV1-  
319 mediated sonogenetics at 0.7 MPa enables safe neuromodulation, while damage at the  
320 meninges was associated with sonogenetics at 1.1 MPa.

321

## 322 **Discussion**

323 Sonogenetics is a rapidly emerging technique that enables noninvasive, cell-type specific  
324 neuromodulation with high spatiotemporal resolution. This study demonstrates the capability  
325 of TRPV1-mediated sonogenetics to modulate behavior in freely moving mice.

326

327 Previous studies have reported sonogenetic-enabled neuromodulation in mice by activating  
328 mechanosensitive ion channels and proteins, such as prestin [17], MscL G22S [18], and  
329 TRPA1 [19], using FUS-induced mechanical effects. They observed neuron activation based  
330 on c-Fos staining, as well as motor responses in head-fixed anesthetized mice based on  
331 electromyography, but did not report induction of real-time behavior modulation in freely  
332 moving mice. Different from these studies, the current study used thermosensitive ion  
333 channel TRPV1-mediated sonogenetics and achieved successful behavior modulation in  
334 freely moving mice. Our previous study demonstrated successful locomotor behavior  
335 modulation by TRPV1-mediated sonogenetics in freely moving mice by targeting a deep  
336 brain region, the striatum [24]. Here we demonstrated that this technique could modulate  
337 locomotor behaviors via a superficial brain target (motor cortex), expanding the application  
338 of TRPV1-mediated sonogenetics to include both superficial and deep brain targets.

339

340 Previous studies have also reported successful neuromodulation using TRPV1-mediated  
341 neuromodulation via combining TRPV1 with different external stimulation modalities.  
342 TRPV1-mediated magnetothermal-genetics targeting both superficial and deep brain targets  
343 were previously reported [21,22]; however, magnetic nanoparticles need to be injected into  
344 the brain to convert energy from an alternating magnetic field to heat for TRPV1 activation.  
345 Recently, TRPV1-mediated photothermal genetic stimulation was reported, which combines  
346 an injection of nanoparticles with near-infrared light to generate heat for TRPV1 activation  
347 [23]. TRPV1-mediated magnetothermal and photothermal genetic modulation of the motor  
348 cortex induced increases in the angular speed of freely moving mice in the contralateral



349 direction, which was consistent with the results of this study at 0.7 MPa sonication. However,  
350 both existing techniques require an additional component of “energy-converting”  
351 nanoparticles that were directly injected into brain tissue. The injection process poses  
352 inflammation and ischemia risks, and the presence of nanoparticles in the brain possesses  
353 immunogenic and biocompatibility concerns. Since FUS-mediated heating does not require  
354 the injection of nanoparticles, it provides a powerful alternative approach to achieving  
355 TRPV1-mediated genetic neuromodulation.

356

357 We show that TRPV1-mediated sonogenetics successfully evoked motor behavior by  
358 targeting the superficial brain target with carefully selected ultrasound parameters.  
359 Ultrasound parameters must be selected to achieve successful behavior control without  
360 causing any detectable tissue damage. Based on behavior, c-Fos, and safety analyses,  
361 TRPV1-mediated sonogenetics at 0.7 MPa met this requirement. However, increasing the  
362 pressure to 1.1 MPa did not evoke statistically significant changes in angular velocity in  
363 TRPV1+ mice relative to the sham sonication at 0 MPa, but evoked significant changes  
364 compared to FUS sonication of TRPV1- mice at 1.1 MPa. FUS sonication at 1.1 MPa in  
365 TRPV1- mice showed a trend, although not significant, to evoke ipsilateral rotations. These  
366 findings suggested that FUS stimulation at 1.1 MPa alone could impact animal behavior. It  
367 was interesting to find that damage to the meninges was observed at 1.1 MPa, although no  
368 damage to the brain tissue was clearly detected. Damage to the meninges was due to its  
369 proximity to the skull. The high skull absorption of ultrasound at 1.1 MPa caused thermal-  
370 induced damage to the meninges. Therefore, ultrasound parameter selection must be  
371 carefully selected when performing TRPV1-mediated sonogenetics to achieve effective and  
372 safe neuromodulation.

373

374 **Conclusion**

375 In conclusion, our findings demonstrated the feasibility and safety of using TRPV1-mediated  
376 sonogenetics to modulate locomotor behaviors by targeting the motor cortex. Combined with  
377 our previous report on TRPV1-mediated sonogenetics for behavior modulation by targeting  
378 the deep brain region, our present study indicates that this technique can facilitate  
379 neuromodulation at the whole depth of the mouse brain.

380

381 **Acknowledgments:** This work was supported by the NIH R01EB027223, R01EB030102,  
382 and R01MH116981. This work was also supported by the Hope Center Viral Vectors Core,  
383 the Alafi Neuroimaging Laboratory, the Hope Center for Neurological Disorders, and the NIH  
384 Shared Instrumentation Grant (S10 RR0227552) to Washington University.

385

386 **Conflict of interest:** Authors report no conflict of interest.

387

388 **Data statement:** The data that from this study are available from the corresponding author  
389 upon reasonable request.

## 390 **References**

- 391 [1] Wagner T, Valero-Cabre A, Pascual-Leone A. Noninvasive human brain stimulation.  
392 *Annu Rev Biomed Eng* 2007;9:527–65.  
393 <https://doi.org/10.1146/annurev.bioeng.9.061206.133100>.
- 394 [2] Folloni D, Verhagen L, Mars RB, Fouragnan E, Constans C, Aubry JF, et al.  
395 Manipulation of Subcortical and Deep Cortical Activity in the Primate Brain Using  
396 Transcranial Focused Ultrasound Stimulation. *Neuron* 2019;101:1109-1116.e5.  
397 <https://doi.org/10.1016/j.neuron.2019.01.019>.
- 398 [3] Fenno L, Yizhar O, Deisseroth K. The development and application of optogenetics.  
399 *Annu Rev Neurosci* 2011;34:389–412. [https://doi.org/10.1146/annurev-neuro-061010-](https://doi.org/10.1146/annurev-neuro-061010-113817)  
400 [113817](https://doi.org/10.1146/annurev-neuro-061010-113817).
- 401 [4] Sternson SM, Roth BL. Chemogenetic tools to interrogate brain functions. *Annu Rev*  
402 *Neurosci* 2014;37:387–407. <https://doi.org/10.1146/annurev-neuro-071013-014048>.
- 403 [5] Chen R, Gore F, Nguyen QA, Ramakrishnan C, Patel S, Kim SH, et al. Deep brain  
404 optogenetics without intracranial surgery. *Nat Biotechnol* 2021;39:161–4.  
405 <https://doi.org/10.1038/s41587-020-0679-9>.
- 406 [6] Rabut C, Yoo S, Hurt RC, Jin Z, Li H, Guo H, et al. Ultrasound Technologies for  
407 Imaging and Modulating Neural Activity. *Neuron* 2020;108:93–110.  
408 <https://doi.org/10.1016/j.neuron.2020.09.003>.
- 409 [7] Tufail Y, Matyushov A, Baldwin N, Tauchmann ML, Georges J, Yoshihiro A, et al.  
410 Transcranial Pulsed Ultrasound Stimulates Intact Brain Circuits. *Neuron* 2010;66:681–  
411 94. <https://doi.org/10.1016/j.neuron.2010.05.008>.
- 412 [8] Legon W, Sato TF, Opitz A, Mueller J, Barbour A, Williams A, et al. Transcranial  
413 focused ultrasound modulates the activity of primary somatosensory cortex in humans.  
414 *Nat Neurosci* 2014;17:322–9. <https://doi.org/10.1038/nn.3620>.
- 415 [9] Ibsen S, Tong A, Schutt C, Esener S, Chalasani SH. Sonogenetics is a non-invasive  
416 approach to activating neurons in *Caenorhabditis elegans*. *Nat Commun* 2015.

- 417 <https://doi.org/10.1038/ncomms9264>.
- 418 [10] Kubanek J, Shi J, Marsh J, Chen D, Deng C, Cui J. Ultrasound modulates ion channel  
419 currents. *Sci Rep* 2016. <https://doi.org/10.1038/srep24170>.
- 420 [11] Ye J, Tang S, Meng L, Li X, Wen X, Chen S, et al. Ultrasonic Control of Neural  
421 Activity through Activation of the Mechanosensitive Channel MscL. *Nano Lett*  
422 2018;18:4148–55. <https://doi.org/10.1021/acs.nanolett.8b00935>.
- 423 [12] Qiu Z, Guo J, Kala S, Zhu J, Xian Q, Qiu W, et al. The Mechanosensitive Ion Channel  
424 Piezo1 Significantly Mediates In Vitro Ultrasonic Stimulation of Neurons. *IScience*  
425 2019. <https://doi.org/10.1016/j.isci.2019.10.037>.
- 426 [13] Kubanek J, Shukla P, Das A, Baccus SA, Goodman MB. Ultrasound elicits behavioral  
427 responses through mechanical effects on neurons and ion channels in a simple  
428 nervous system. *J Neurosci* 2018. <https://doi.org/10.1523/JNEUROSCI.1458-17.2018>.
- 429 [14] Huang YS, Fan CH, Hsu N, Chiu NH, Wu CY, Chang CY, et al. Sonogenetic  
430 Modulation of Cellular Activities Using an Engineered Auditory-Sensing Protein. *Nano*  
431 *Lett* 2020;20:1089–100. <https://doi.org/10.1021/acs.nanolett.9b04373>.
- 432 [15] Oh SJ, Lee JM, Kim HB, Lee J, Han S, Bae JY, et al. Ultrasonic Neuromodulation via  
433 Astrocytic TRPA1. *Curr Biol* 2019;29:3386-3401.e8.  
434 <https://doi.org/10.1016/j.cub.2019.08.021>.
- 435 [16] Yoo S, Mittelstein D, Hurt R, Lacroix J, Shapiro M. Focused ultrasound excites  
436 neurons via mechanosensitive calcium accumulation and ion channel amplification  
437 2020. <https://doi.org/10.1101/2020.05.19.101196>.
- 438 [17] Fan CH, Wei KC, Chiu NH, Liao EC, Wang HC, Wu RY, et al. Sonogenetic-Based  
439 Neuromodulation for the Amelioration of Parkinson's Disease. *Nano Lett*  
440 2021;21:5967–76. <https://doi.org/10.1021/acs.nanolett.1c00886>.
- 441 [18] Qiu Z, Kala S, Guo J, Xian Q, Zhu J, Zhu T, et al. Targeted Neurostimulation in  
442 Mouse Brains with Non-invasive Ultrasound. *Cell Rep* 2020;32.  
443 <https://doi.org/10.1016/j.celrep.2020.108033>.
- 444 [19] Duque M, Lee-Kubli CA, Tufail Y, Magaram U, Patel J, Chakraborty A, et al.

- 445 Sonogenetic control of mammalian cells using exogenous Transient Receptor  
446 Potential A1 channels. *Nat Commun* 2022;13. [https://doi.org/10.1038/s41467-022-](https://doi.org/10.1038/s41467-022-28205-y)  
447 [28205-y](https://doi.org/10.1038/s41467-022-28205-y).
- 448 [20] Dhaka A, Viswanath V, Patapoutian A. TRP ion channels and temperature sensation.  
449 *Annu Rev Neurosci* 2006;29:135–61.  
450 <https://doi.org/10.1146/annurev.neuro.29.051605.112958>.
- 451 [21] Chen R, Romero G, Christiansen MG, Mohr A, Anikeeva P. Wireless magnetothermal  
452 deep brain stimulation. *Science* (80- ) 2015;347:1477–80.  
453 <https://doi.org/10.1126/science.1261821>.
- 454 [22] Munshi R, Qadri SM, Zhang Q, Rubio IC, del Pino P, Pralle A. Magnetothermal  
455 genetic deep brain stimulation of motor behaviors in awake, freely moving mice. *Elife*  
456 2017;6. <https://doi.org/10.7554/eLife.27069>.
- 457 [23] Wu X, Jiang Y, Rommelfanger NJ, Yang F, Zhou Q, Yin R, et al. Tether-free  
458 photothermal deep-brain stimulation in freely behaving mice via wide-field illumination  
459 in the near-infrared-II window. *Nat Biomed Eng* 2022;6:754–70.  
460 <https://doi.org/10.1038/s41551-022-00862-w>.
- 461 [24] Yang Y, Pacia CP, Ye D, Zhu L, Baek H, Yue Y, et al. Sonothermogenetics for  
462 noninvasive and cell-type specific deep brain neuromodulation. *Brain Stimul* 2021;0.  
463 <https://doi.org/10.1016/j.brs.2021.04.021>.
- 464 [25] Hynynen K, McDannold N, Clement G, Jolesz FA, Zadicario E, Killiany R, et al. Pre-  
465 clinical testing of a phased array ultrasound system for MRI-guided noninvasive  
466 surgery of the brain-A primate study. *Eur J Radiol* 2006;59:149–56.  
467 <https://doi.org/10.1016/j.ejrad.2006.04.007>.
- 468 [26] Pinton G, Aubry JF, Bossy E, Muller M, Pernot M, Tanter M. Attenuation, scattering,  
469 and absorption of ultrasound in the skull bone. *Med Phys* 2012;39:299–307.  
470 <https://doi.org/10.1118/1.3668316>.
- 471 [27] Mohammadjavadi M, Ye PP, Xia A, Brown J, Popelka G, Pauly KB. Elimination of  
472 peripheral auditory pathway activation does not affect motor responses from

473 ultrasound neuromodulation. *Brain Stimul* 2019;12:901–10.

474 <https://doi.org/10.1016/j.brs.2019.03.005>.

475 [28] Kovács KJ. c-Fos as a transcription factor: A stressful (re)view from a functional map.

476 *Neurochem Int* 1998;33:287–97. [https://doi.org/10.1016/S0197-0186\(98\)00023-0](https://doi.org/10.1016/S0197-0186(98)00023-0).

477 [29] Damisah EC, Hill RA, Rai A, Chen F, Rothlin C V., Ghosh S, et al. Astrocytes and

478 microglia play orchestrated roles and respect phagocytic territories during neuronal

479 corpse removal in vivo. *Sci Adv* 2020;6:1–13. <https://doi.org/10.1126/sciadv.aba3239>.

480

481

## 482 **Figure Captions**

483 **Fig. 1. Experimental setup.** (a) Experimental timeline. The study begins with intracranial  
484 injection of adeno-associated virus encoding TRPV1 (TRPV1+ mice). Control mice were  
485 injected with a control viral vector (TRPV1- mice). After 4-5 weeks, a wearable FUS device  
486 was installed onto the mouse skull to target the same location where the viral vectors were  
487 injected. The stimulation apparatus consists of a computer, function generator, and power  
488 amplifier to apply FUS to the wearable FUS device. Approximately 90 minutes after the final  
489 stimulation, mice brains were harvested for c-Fos and safety analyses. (b) Schematic of the  
490 ultrasound waveform used during the behavior test. FUS was applied with a center  
491 frequency of 1.5 MHz, a pulse repetition frequency (PRF) of 10 Hz, and a duty cycle (DC) of  
492 40%. The burst duration (BD) was 15 s with an inter-stimulus interval (ISI) of 185 s, for a  
493 total of five stimulations with a total time (TT) of 1000 s.

494

495 **Fig. 2. Characterization of exogenous TRPV1 expression in the motor cortex.** (a)  
496 Representative immunofluorescence image of TRPV1+ mouse brain slice that has been  
497 stained with anti-TRPV1 antibody (red) and Nissl dye (blue) (Scale bar = 1 mm). The yellow  
498 box corresponds to a higher magnification image (Scale bar = 100  $\mu$ m). Quantification of (b)  
499 the viral spread of TRPV1 expression, (c) the density of TRPV1+ neurons in the motor  
500 cortex, (d) the proportion of TRPV1+ neurons in the motor cortex, and (e) the proportion of  
501 TRPV1+ cells that are neurons. Data are reported as mean  $\pm$  SEM.

502

503 **Fig. 3. Sonogenetics with TRPV1 evokes rotational behavior at 0.7 MPa.** (a)  
504 Representative position plots of TRPV1+ and TRPV1- mice with and without the application  
505 of one FUS stimulation. Representative plots of (b) the angular displacement over time and  
506 (c) angular velocity over time. The yellow bars correspond to the application of FUS at an  
507 acoustic pressure of 0.7 MPa.

508



509 **Fig. 4. TRPV1-mediated sonogenetics at 0.7 MPa facilitates direction-specific**  
510 **locomotor control.** Summary plot of the average angular velocity for TRPV1- and TRPV1+  
511 mice at 0, 0.7, and 1.1 MPa FUS sonications. Angular velocity values greater than zero  
512 correspond to contralateral rotations (clockwise), while angular velocity values less than zero  
513 correspond to ipsilateral rotations (counter-clockwise). Each point represents one stimulation.  
514 Data are reported as mean  $\pm$  SEM. Statistical analysis was conducted using two-way  
515 repeated measures ANOVA with Bonferroni post-hoc test.

516

517 **Fig. 5. TRPV1-mediated sonogenetics activates cortical neurons at the cellular level.**  
518 (a) Representative immunofluorescence images of TRPV1- and TRPV1+ mice brains  
519 stained with anti-c-Fos antibody (green) and Nissl dye (blue) at the unstimulated side, 0.7,  
520 and 1.1 MPa (Scale bar = 100  $\mu$ m). (b) Quantification of the c-Fos+ neuron count in the  
521 motor cortex. FUS sonication at 0.7 and 1.1 MPa enhanced the number of c-Fos expressing  
522 neurons in the motor cortex in TRPV1+ mice. Data are reported as mean  $\pm$  SEM. Statistical  
523 analysis was conducted with two-way repeated-measures ANOVA with Bonferroni's post-  
524 hoc test.

525

526 **Fig. 6. TRPV1-mediated sonogenetics at 0.7 MPa did not show signs of inflammation**  
527 **or apoptosis.** (a) Representative gross pathology images of the mice skull and brain 90  
528 minutes after the last FUS sonication at 0, 0.7, and 1.1 MPa. The first column of images  
529 shows the intact skull of the perfused mouse, and the second column of images shows the  
530 intact brain of the perfused mouse (scale bar = 5 mm). (b) Representative  
531 immunofluorescence images of mice brains stained with Nissl dye (cyan), anti-GFAP  
532 antibody (yellow), anti-Iba1 antibody (magenta), and anti-Caspase-3 antibody (red) at 0, 0.7,  
533 and 1.1 MPa (scale bar = 100  $\mu$ m). (c) Summary of neuron, astrocyte, microglia, and  
534 caspase-3 cell counts in the mice motor cortex after FUS sonication at 0, 0.7, and 1.1 MPa.  
535 Data are reported as mean  $\pm$  SEM. Statistical analysis was conducted with one-way  
536 repeated-measures ANOVA with Dunnett's post-hoc test.

537

538 **Fig. 1.**

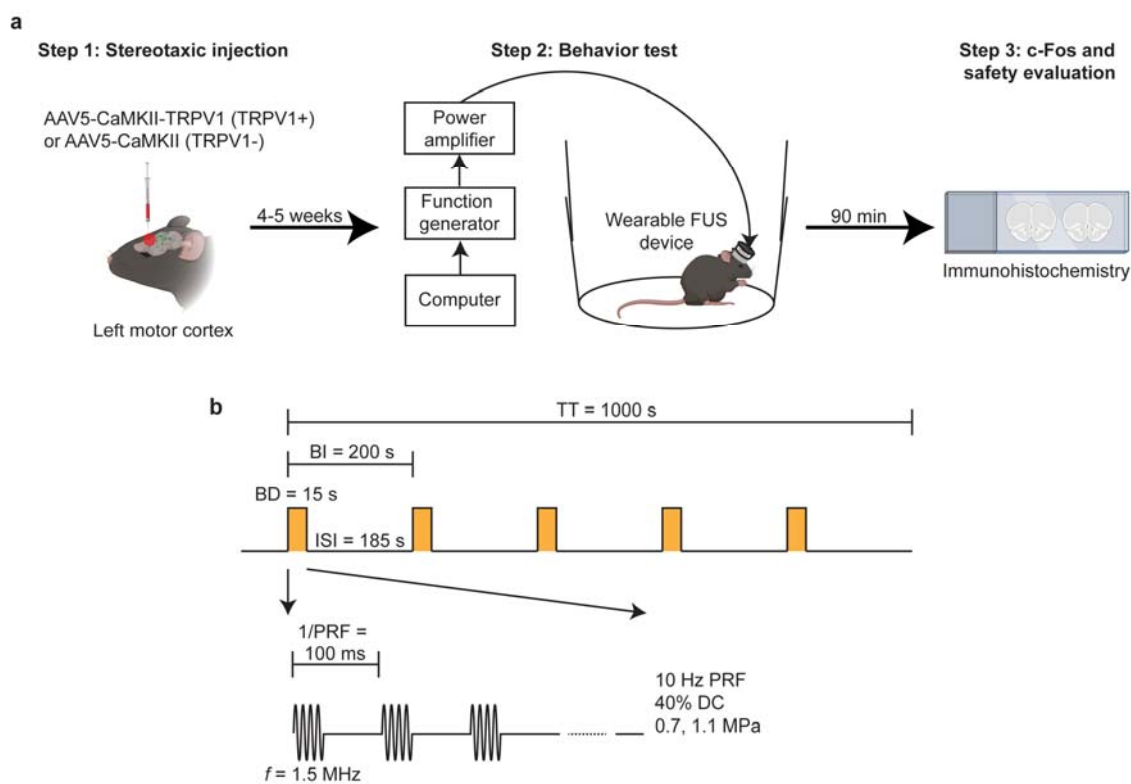

539

540 **Fig. 2.**

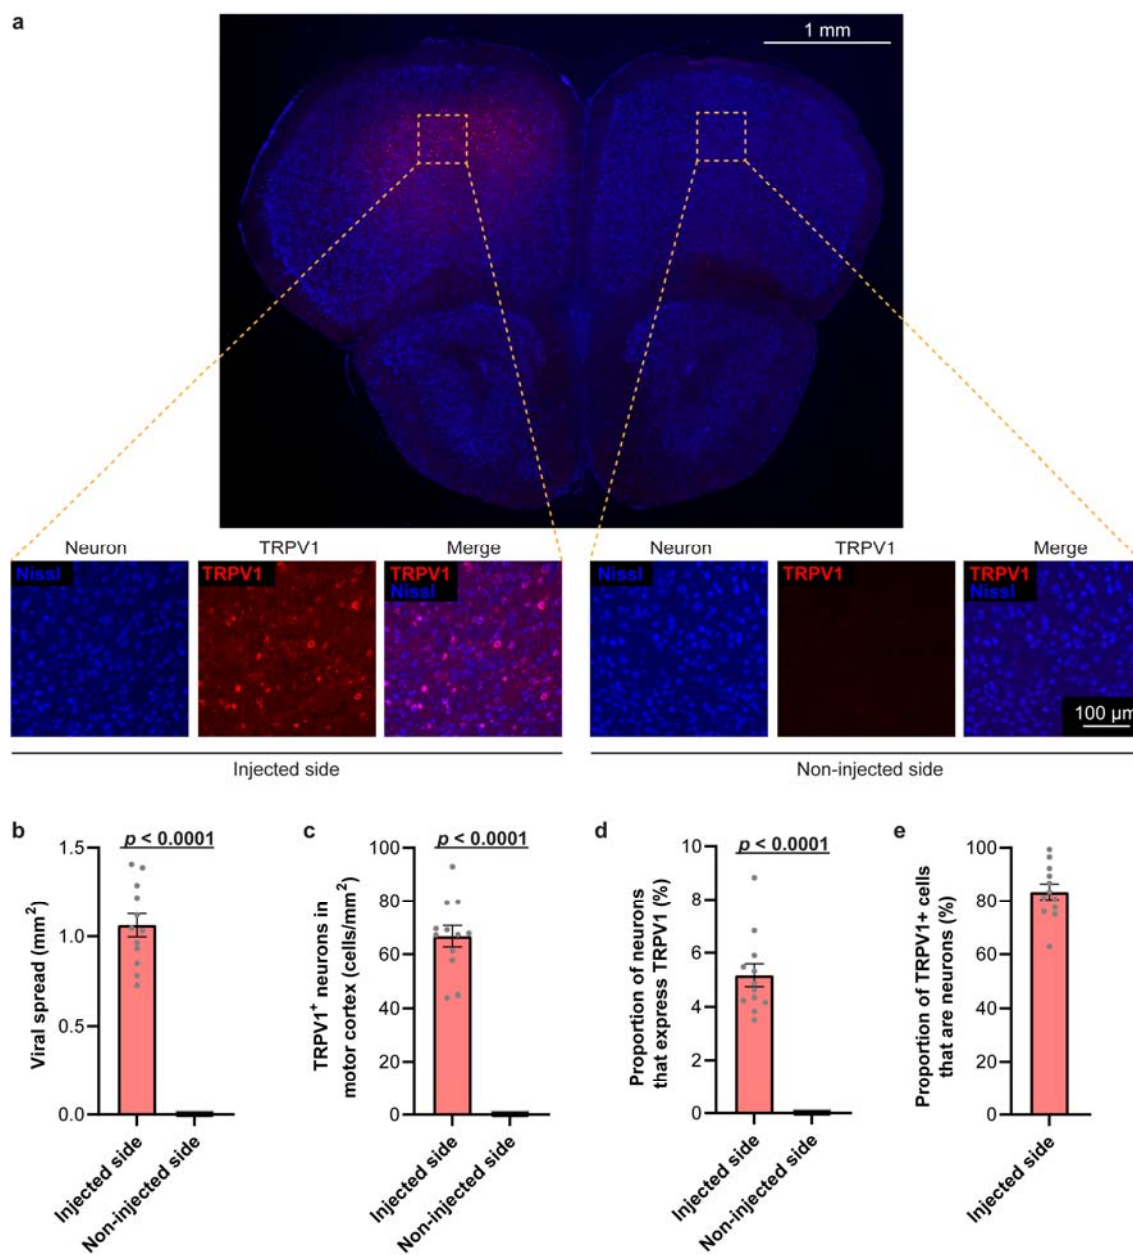

541  
542

543 **Fig. 3.**

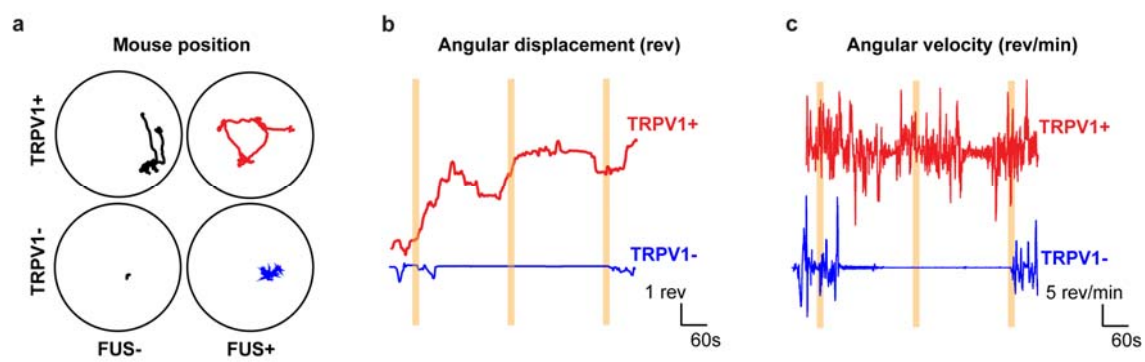

545 **Fig. 4.**

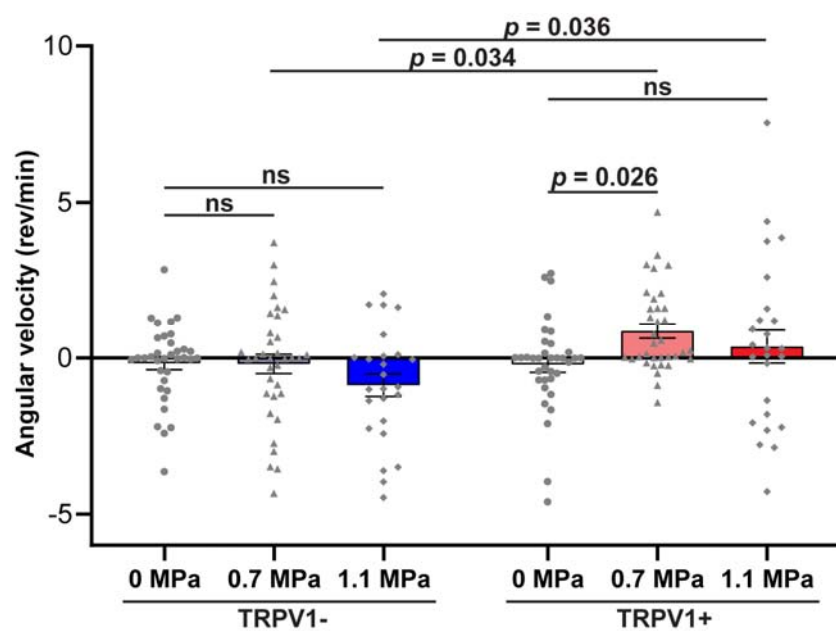

546

547 **Fig. 5.**

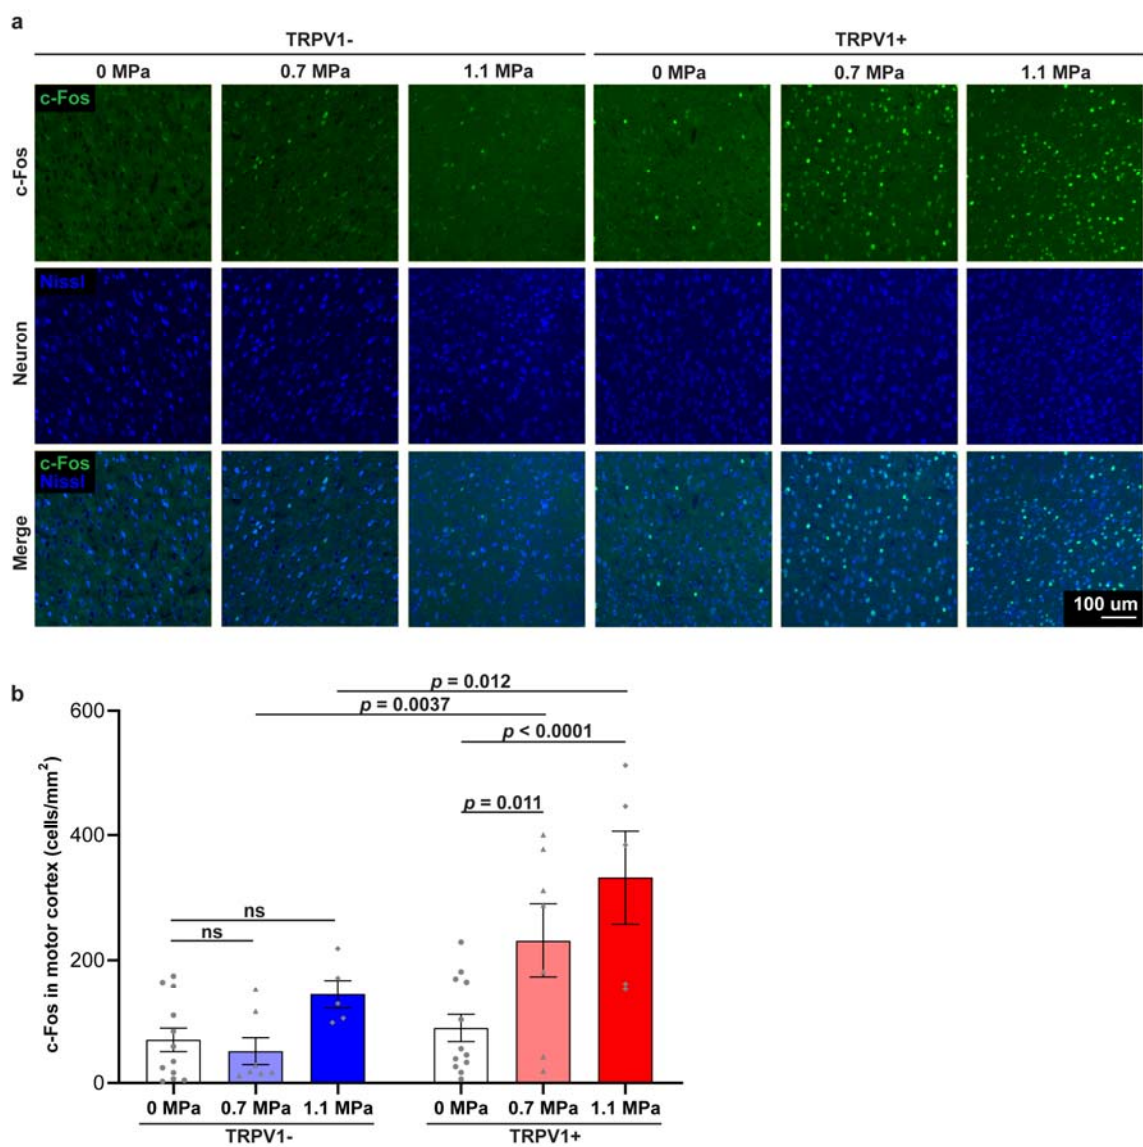

548  
549



550 **Fig. 6.**

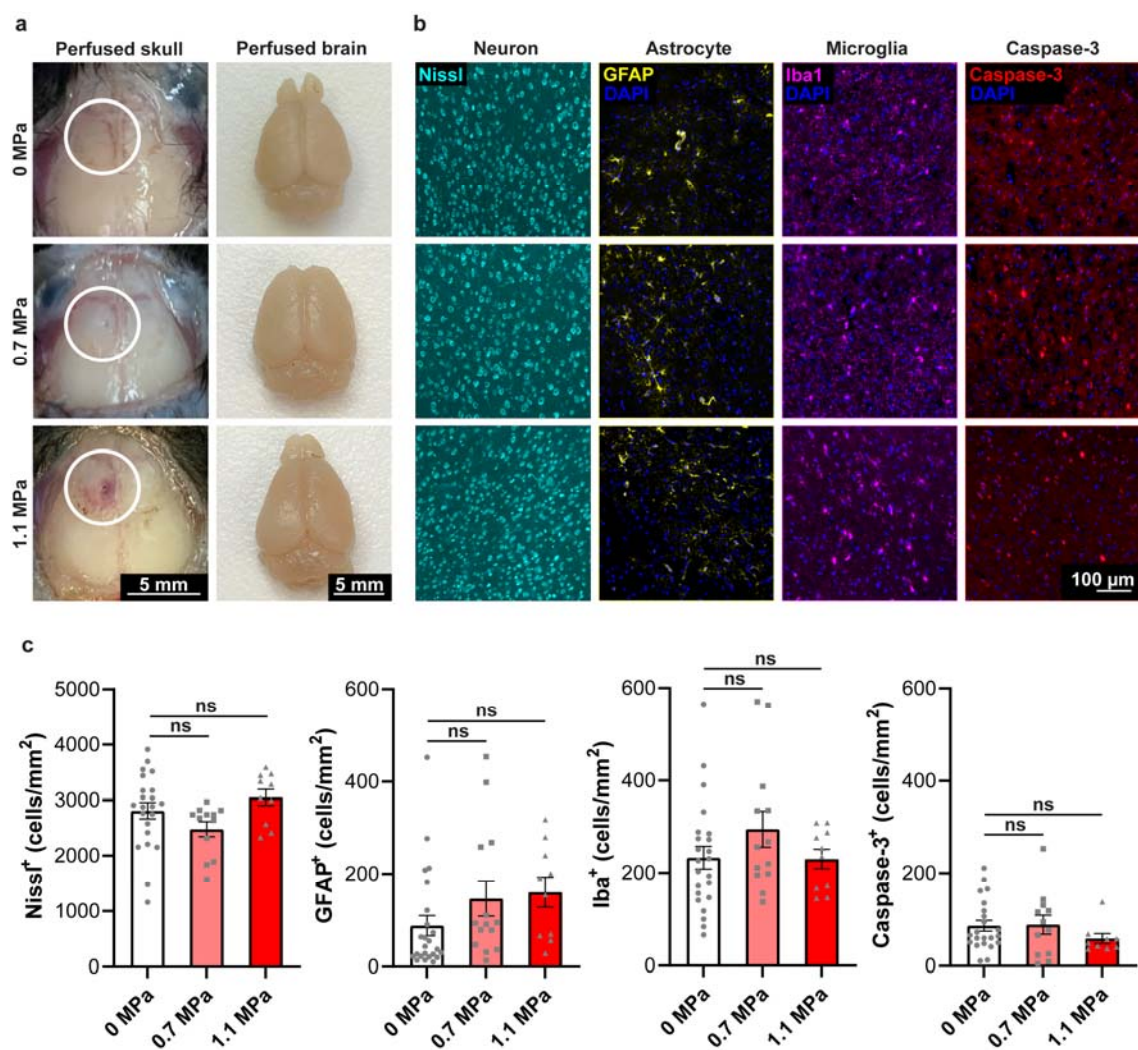

551

552
